# Supplementary material for: Systems-Level Comparison of Host-Responses Elicited by Avian H5N1 and Seasonal H1N1 Influenza Viruses in Primary Human Macrophages
Source: PLoS One. 2009 Dec 14;4(12):e8072. doi: 10.1371/journal.pone.0008072 (PMC2788213; doi:10.1371/journal.pone.0008072)
Supplement: Table S1 — Summary of gene expression in response to influenza A virus infection. Fold change of gene expression in response to H1N1 and H5N1 compared to mock infection at 1, 3 and 6 h post-infection time were shown. The “-” and no sign before the number indicates the down- and up-regulation of the gene respectively in influenza A infected cells compared to mock. HGNC Gene Symbol is HUGO Gene Nomenclature Committee approved gene symbol. *Ratio [H5N1,6 h]/[H1N1,6 h] indicates the fold change of gene expression in response to H5N1 compared to H1N1 infection at 6 h post-infection time. **IFN-Related? indicates if the gene is related to the IFN response. (0.05 MB XLS) [file pone.0008072.s001.xls]

## Sheet: Sheet1
Transcripts ID	H1N1 1h	H1N1 3h	H1N1 6h	H5N1 1h	H5N1 3h	H5N1 6h	Ensembl Gene ID	HGNC Gene Symbol	*Ratio [H5N1,6h]/ [H1N1,6h]	**IFN-Related?
7938390	-1.04	-1.04	1.3	-1.01	1	1.51	ENSG00000148926	ADM	1.16154	No
8043621	1	-1.03	1.39	-1.02	-1.08	2	ENSG00000196843	ARID5A	1.43885	No
8030557	-1.03	1.06	1.22	-1.05	1.01	1.91	ENSG00000169136	ATF5	1.56557	Type I target gene
8086330	1.01	1	2.49	1.07	-1.11	3.44	ENSG00000144655	AXUD1	1.38153	Type I target gene
7926875	-1.16	-1.01	1.27	1.01	1.04	2.36	ENSG00000095739	BAMBI	1.85827	No
7943413	-1.08	-1.06	1.82	-1.05	1.04	2.43	ENSG00000023445	BIRC3	1.33516	Type I target gene
8081073	-1.14	-1.08	1.45	1.01	-1.04	1.64	ENSG00000179021	C3orf38	1.13103	No
8048864	1.04	1.02	1.56	1.07	1.04	3.04	ENSG00000115009	CCL20	1.94872	No
8014369	-1.01	1.04	2.12	-1.18	1.1	3.87	ENSG00000006075	CCL3	1.82547	Type I target gene
8014391	-1.07	-1	2.43	-1.15	1.2	5.06	ENSG00000205017	CCL3L1	2.0823	No
8006602	-1	-1.05	3.2	1.07	1.26	5.94	ENSG00000129277	CCL4	1.85625	No
8019651	-1.16	1.07	3.16	-1.01	1.6	8.25	ENSG00000205020	CCL4L1	2.61076	No
8014316	1.03	1.07	3.24	1.11	1.19	14.38	ENSG00000161570	CCL5	4.43827	Type I target gene
8006453	-1.01	-1.13	5.98	-1.03	-1.04	17.55	ENSG00000108700	CCL8	2.93478	Type I target gene
8105828	-1.13	-1.2	1.25	1.01	-1.16	2.63	ENSG00000134057	CCNB1	2.104	Type I target gene
8015031	1.23	1.22	1.6	1.06	1.05	2.34	ENSG00000126353	CCR7	1.4625	Type I target gene
8097461	-1.01	-1	1.17	1.05	-1	4.53	ENSG00000151014	CCRN4L	3.87179	No
8154233	-1.02	-1.03	2.36	1.22	-1.02	4.73	ENSG00000120217	CD274	2.00424	No
8098500	-1.07	-1.07	-1.18	1.06	-1.17	-1.71	ENSG00000168564	CDKN2AIP	1.44915	No
7934916	-1.01	-1.01	1.59	-1.04	1.07	1.64	ENSG00000138135	CH25H	1.03145	No
8050102	-1.1	-1.03	1.73	-1.01	-1.01	2.76	ENSG00000134326	CMPK2	1.59538	No
8101126	1	-1.14	18.16	1.01	1.01	68.4	ENSG00000169245	CXCL10	3.76652	No
8101131	-1	1	2.72	-1	1.02	8.82	ENSG00000169248	CXCL11	3.24265	Type I target gene
8101118	-1.02	-1.06	1.71	1.02	-1.04	10.51	ENSG00000138755	CXCL9	6.1462	Type I target gene
8015511	1.06	-1.06	1.49	1.01	1	2.38	ENSG00000108771	DHX58	1.59732	RIG-I
7902512	-1.29	-1.14	1.81	1	1.01	4.07	ENSG00000162616	DNAJB4	2.24862	No
7930413	-1.23	-1.16	1.11	-1	-1.02	1.52	ENSG00000138166	DUSP5	1.36937	Type I target gene
7921228	1.04	1.05	1.13	-1	1.02	1.53	ENSG00000117036	ETV3	1.35398	Type I target gene
8127778	1.09	-1.08	1.54	1.01	-1.06	2.04	ENSG00000112773	FAM46A	1.32468	No
8024485	-1.06	1.03	1.67	-1.01	1.03	2.02	ENSG00000099860	GADD45B	1.20958	Type I target gene
7917561	-1.02	-1.17	2.74	1	-1.03	10.11	ENSG00000162654	GBP4	3.68978	Type I target gene
7917576	1.01	-1.05	2.21	1.06	-1	6.43	ENSG00000154451	GBP5	2.9095	Type I target gene
7967318	1.29	-1.13	1.49	1.07	-1.13	2.37	ENSG00000182782	GPR109A	1.5906	No
7967322	NA	NA	NA	1.07	1.03	2.29	ENSG00000182782	GPR109B	NA	No
7972557	-1.03	-1.07	1.38	1.03	-1.07	1.66	ENSG00000169508	GPR183	1.2029	No
8096361	-1.08	-1.08	4.06	-1.03	-1.01	11.21	ENSG00000138646	HERC5	2.76108	Type I target gene
8124531	1.02	-1.01	1.51	1.09	-1.07	1.3	ENSG00000198366	HIST1H3A	0.860927	No
8129953	-1.12	-1.07	1.58	1.13	-1.19	2.58	ENSG00000010818	HIVEP2	1.63291	No
8025601	1.05	1.01	1.33	-1	-1.08	1.86	ENSG00000090339	ICAM1	1.3985	Type I target gene
8056285	-1.18	-1.14	2.82	-1.03	-1	5.95	ENSG00000115267	IFIH1	2.10993	Type I target gene
7929065	1.04	-1.07	13.67	1.24	1.27	30.44	ENSG00000185745	IFIT1	2.22677	Type I target gene
7929047	1.01	1.1	27.73	1.19	2.71	48.87	ENSG00000119922	IFIT2	1.76235	Type I target gene
7929052	-1.02	-1.04	5.39	1.13	1.23	9.59	ENSG00000119917	IFIT3	1.77922	Type I target gene
7929072	-1.09	-1.08	3.99	1.15	1.06	6.1	ENSG00000152778	IFIT5	1.52882	Type I target gene
8154627	1.01	1.02	1.65	1.01	1.03	4.51	ENSG00000197919	IFNA1	2.73333	Interferon
8160360	-1	-1	1.48	-1	1.11	3.08	ENSG00000171855	IFNB1	2.08108	Interferon
8083690	1.01	-1	1.07	1	-1	1.58	ENSG00000168811	IL12A	1.47664	No
8054722	-1.01	1.17	2.44	1.03	1.72	6.75	ENSG00000125538	IL1B	2.76639	Type I target gene
8028613	-1.02	1.02	1.13	-1.05	1	2.37	ENSG00000182393	IL29	2.09735	Interferon
8095680	-1.02	-1.05	1.83	-1.13	-1	1.97	ENSG00000169429	IL8	1.0765	Type I target gene
8146092	1.01	1.01	2.31	1.04	1.05	12.31	ENSG00000131203	INDO	5.329	Type I target gene
8077786	-1.09	1	1.27	-1.03	-1.03	1.59	ENSG00000134070	IRAK2	1.25197	No
8114010	-1.06	-1.1	2.61	-1.04	-1.09	5.17	ENSG00000125347	IRF1	1.98084	Type I target gene
8103911	1.01	-1.01	1.32	1.05	-1.03	1.54	ENSG00000168310	IRF2	1.16667	Type I target gene
7896817	1.1	1.05	1.65	1.07	1.1	3.63	ENSG00000187608	ISG15	2.2	Type I target gene
7985777	1.02	1.01	1.32	-1.01	1	1.69	ENSG00000172183	ISG20	1.2803	Type I target gene
8131666	1.05	-1.09	1.36	1.12	-1.1	1.85	ENSG00000105855	ITGB8	1.36029	Type I target gene
8163002	1.13	-1.09	1.65	1.06	-1.07	2.46	ENSG00000136826	KLF4	1.49091	No
8092348	-1	-1	1.49	1.04	1.01	4.45	ENSG00000078081	LAMP3	2.98658	Type I target gene
8115734	-1.03	-1.06	1.24	1.06	-1.04	1.63	ENSG00000043462	LCP2	1.31452	No
8053944	1.03	-1.06	1.22	1.03	-1.01	1.76	ENSG00000163121	LINCR	1.44262	No
7926900	1	-1.06	1.63	1.05	-1.05	2.13	ENSG00000107968	MAP3K8	1.30675	Type I target gene
7983763	-1.27	-1.14	1.58	1	-1.13	1.24	ENSG00000069956	MAPK6	0.78481	No
7926821	-1.01	-1.08	1.95	1.12	-1	2.38	ENSG00000120539	MASTL	1.22051	No
8090893	1.08	-1.01	-1.21	1.06	-1.07	-1.59	ENSG00000174579	MSL2	1.31405	No
8068713	1.02	1.05	2.56	1.16	-1.02	3.91	ENSG00000157601	MX1	1.52734	Type I target gene
8042503	1.01	-1.15	1.71	1.02	-1.1	4.22	ENSG00000059728	MXD1	2.46784	No
8071155	1.06	-1.07	1.77	1.14	-1.08	2.07	ENSG00000105835	NAMPT	1.16949	No
7978644	-1.04	1.03	1.53	1	1.12	2.21	ENSG00000100906	NFKBIA	1.44444	Type I target gene
8081386	-1.01	-1.05	2.37	1.1	1.3	4.33	ENSG00000144802	NFKBIZ	1.827	No
8055952	1.15	1.03	1.43	1.09	1.05	1.77	ENSG00000153234	NR4A2	1.23776	No
7967117	-1.05	-1.02	4.52	-1.02	1.02	16.51	ENSG00000135114	OASL	3.65265	Type I target gene
7926677	-1.09	-1.13	1.66	1.17	-1.01	3.07	ENSG00000165312	OTUD1	1.8494	No
8052654	-1.16	-1.08	1.62	1.07	-1.13	3.93	ENSG00000197329	PELI1	2.42593	No
7926037	-1.08	-1.09	1.24	1.01	-1.08	2.66	ENSG00000170525	PFKFB3	2.14516	No
7984217	1.03	1.05	-1.23	1.01	1.01	-1.52	ENSG00000169094	PLEKHO2	1.23577	No
8021470	-1.08	-1.02	5.94	1.07	1.64	22.64	ENSG00000141682	PMAIP1	3.81145	Type I target gene
8030128	-1.01	-1.07	1.32	1.05	-1.05	2.41	ENSG00000087074	PPP1R15A	1.82576	No
8121257	-1.09	-1.03	1.76	1.01	-1.06	2.44	ENSG00000057657	PRDM1	1.38636	Type I target gene
8067680	-1	1.03	1.35	-1.04	1.05	1.91	ENSG00000130589	PRIC285	1.41481	No
7922976	1.06	1.05	3.87	1.06	1.32	17.35	ENSG00000073756	PTGS2	4.4832	No
8083594	-1.02	-1.02	1.56	1.06	-1.07	3.33	ENSG00000163661	PTX3	2.13462	Type I target gene
7994161	-1.01	-1.07	1.71	1.08	-1.06	2.11	ENSG00000122257	RBBP6	1.23392	No
8070182	-1.11	-1.04	1.24	-1.03	-1.01	1.94	ENSG00000159200	RCAN1	1.56452	Type I target gene
8147206	-1.11	-1.11	1.46	1.1	-1.05	1.76	ENSG00000104312	RIPK2	1.20548	No
7914603	1.04	-1.03	1.51	1.04	1.02	2.72	ENSG00000116514	RNF19B	1.80132	Type I target gene
8040080	1	-1.1	4.32	1.23	-1	9.84	ENSG00000134321	RSAD2	2.27778	Type I target gene
8084732	1.02	-1.11	2.22	1.04	-1.09	3.64	ENSG00000136514	RTP4	1.63964	Type I target gene
8128394	-1.16	-1.14	1.56	1.04	-1.13	1.13	ENSG00000132424	SFRS18	0.724359	No
8129677	-1.05	-1.06	-1.07	1.05	-1.06	-1.76	ENSG00000118515	SGK1	1.64486	No
7906613	-1.08	-1.11	1.23	1.03	-1.07	1.57	ENSG00000026751	SLAMF7	1.27642	No
8017843	1.13	-1.07	1.63	1.19	-1.06	1.29	ENSG00000108932	SLC16A6	0.791411	No
7999423	-1.02	-1.03	1.43	-1.02	-1.02	3.59	ENSG00000185338	SOCS1	2.51049	Type I target gene
8018864	1.02	1	1.41	1.03	-1.05	3.74	ENSG00000184557	SOCS3	2.65248	Type I target gene
7972217	-1.09	-1.04	-1.31	-1.01	-1.12	-1.84	ENSG00000136158	SPRY2	1.40458	No
8009526	1	1.01	1.21	1.01	-1.05	1.5	ENSG00000180616	SSTR2	1.23967	No
8122457	-1.07	-1.02	1.36	1.02	-1.09	1.91	ENSG00000135604	STX11	1.40441	No
8083569	-1.11	-1.03	1.69	1.02	-1.04	2.44	ENSG00000163659	TIPARP	1.44379	Type I target gene
8155707	-1.05	-1.15	1.31	1.02	-1.04	1.69	ENSG00000119139	TJP2	1.29008	No
8179263	1.04	1.07	6.68	-1.02	2.4	17.3	ENSG00000204490	TNF	2.58982	No
8122265	-1	1.03	1.94	1.05	1.06	3.19	ENSG00000118503	TNFAIP3	1.64433	Type I target gene
8045688	-1.38	1.02	2.5	-1.07	1.07	4.7	ENSG00000123610	TNFAIP6	1.88	No
8092169	-1.06	-1.1	5.09	1.03	-1.04	10.46	ENSG00000121858	TNFSF10	2.05501	No
8163618	-1.11	-1.11	1.07	1.17	-1.11	2.52	ENSG00000181634	TNFSF15	2.35514	No
8025053	1.02	1.04	1.09	-1.01	1.05	1.87	ENSG00000125657	TNFSF9	1.7156	No
8163825	-1.07	1.03	1.21	1.04	-1.02	2.03	ENSG00000056558	TRAF1	1.67769	No
8128939	-1.07	-1.04	1.1	1.1	-1.05	1.59	ENSG00000056972	TRAF3IP2	1.44545	No
8142120	-1.14	-1.05	2.99	1.13	-1.14	4.58	ENSG00000184979	USP18	1.53177	RIG-I
8123129	-1.16	-1.11	1.43	1.05	-1.09	1.5	ENSG00000146457	WTAP	1.04895	No
7900146	-1.01	-1.01	1.55	-1.1	-1.01	1.98	ENSG00000163874	ZC3H12A	1.27742	No
7943715	1	-1.08	1.47	1.05	-1.08	1.65	ENSG00000149289	ZC3H12C	1.12245	No
8166500	-1.2	-1.08	1.27	-1.06	-1.21	1.8	ENSG00000005889	ZFX	1.41732	Type I target gene
8066905	-1.09	-1.01	1.32	1.04	-1.02	1.86	ENSG00000124201	ZNFX1	1.40909	No
